# Supplementary material for: Synthesis and visible light responsed photocatalytic activity of Sn doped Bi2S3 microspheres assembled by nanosheets
Source: Royal Society of Chemistry journal article supplement (doi:10.1039/c6ra02621d), 2016-01-01
Supplement: c6ra02621d1.pdf [file c6ra02621d1.pdf]

## Supporting information

### Synthesis and visible light responded photocatalytic activity of Sn doped $\text{Bi}_2\text{S}_3$ Microspheres assembled by Nanosheets

Yifan Jiang, Juncheng Hu\*, Jinlin Li

*Key Laboratory of Catalysis and Materials Science of the State Ethnic Affairs Commission & Ministry of Education, Hubei Province, South-Central University for Nationalities, Wuhan 430074, PR China.*

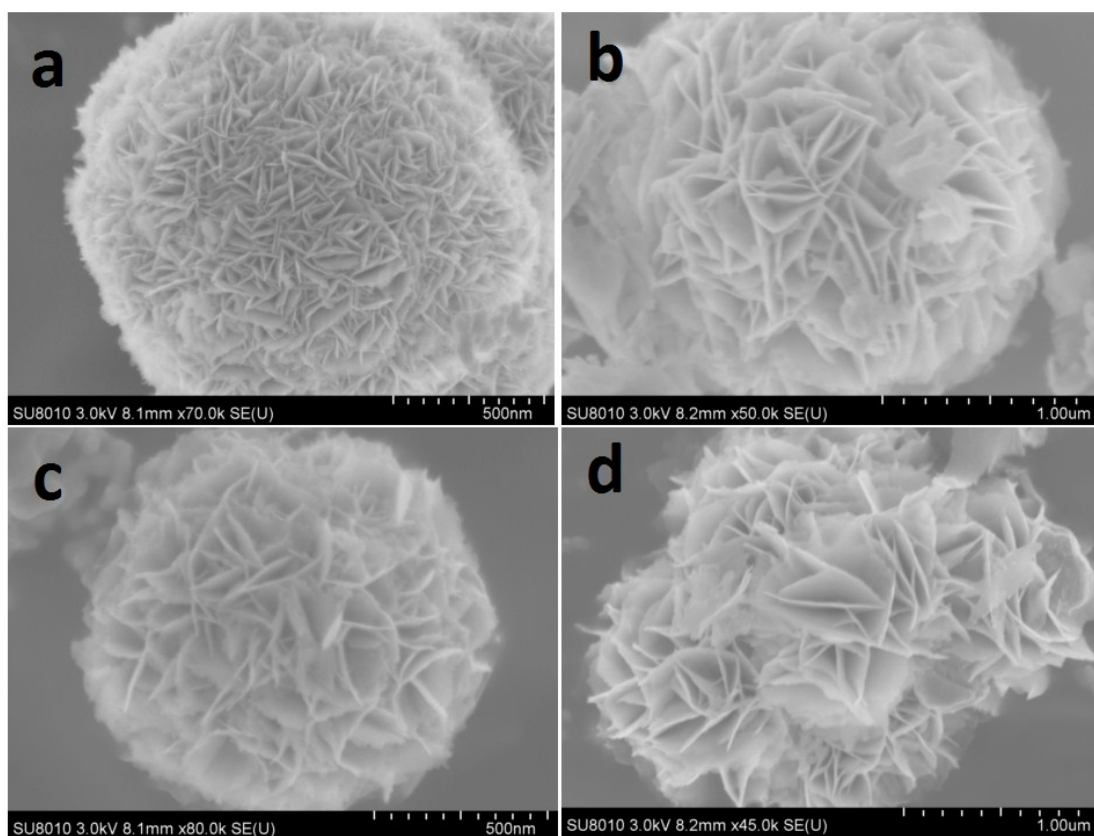

Fig. S1 SEM images of (a) 1 mol % TDB, (b) 2 mol % TDB, (c) 4 mol % TDB, (d) 5 mol % TDB.

Table S1 BET surface area of the as-synthesized samples.

|                                                 | Pure<br>$\text{Bi}_2\text{S}_3$ | 1 mol %<br>TDB | 2 mol %<br>TDB | 3 mol %<br>TDB | 4 mol %<br>TDB | 5 mol %<br>TDB |
|-------------------------------------------------|---------------------------------|----------------|----------------|----------------|----------------|----------------|
| $S_{\text{BET}}$ ( $\text{m}^2 \text{g}^{-1}$ ) | 10.5                            | 13.7           | 14.8           | 16.6           | 17.1           | 17.8           |

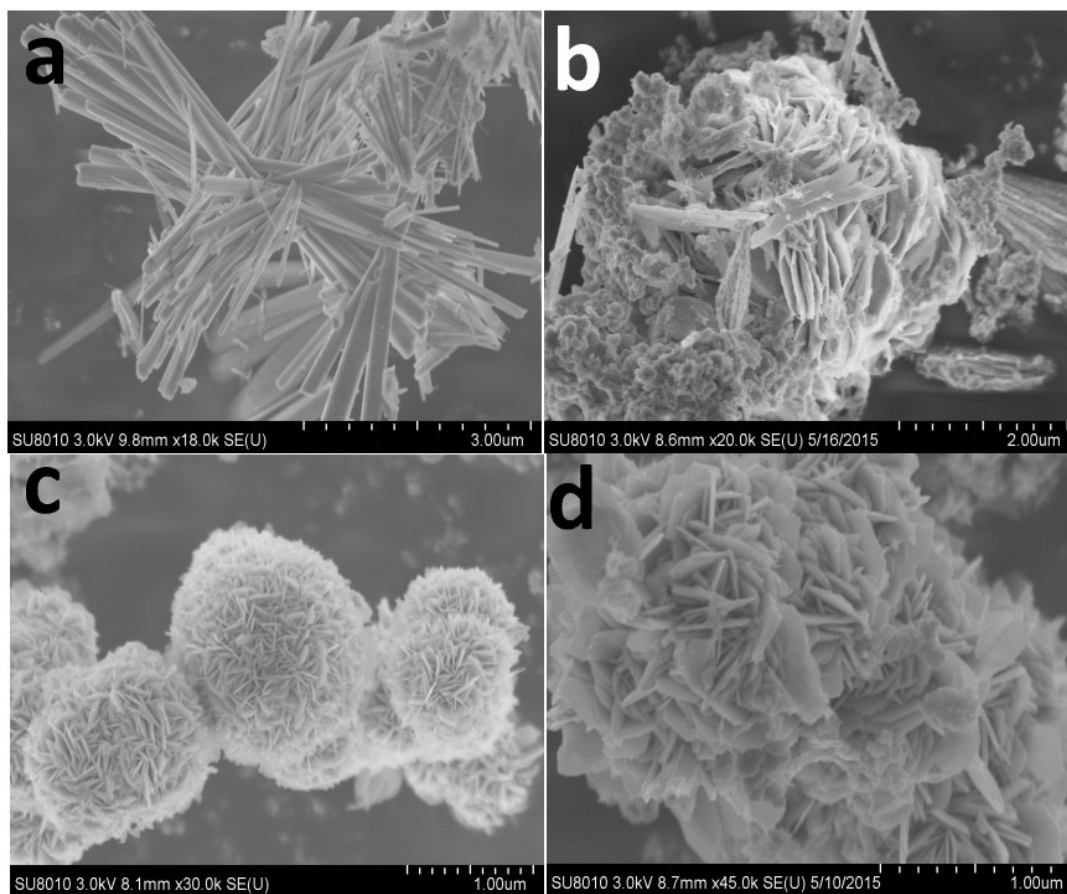

Fig. S2 SEM images of  $\text{Bi}_2\text{S}_3$  with different amounts of oleylamine, (a) 0 mol, (b) 3 mol, (c) 6 mol, (d) 8 mol.

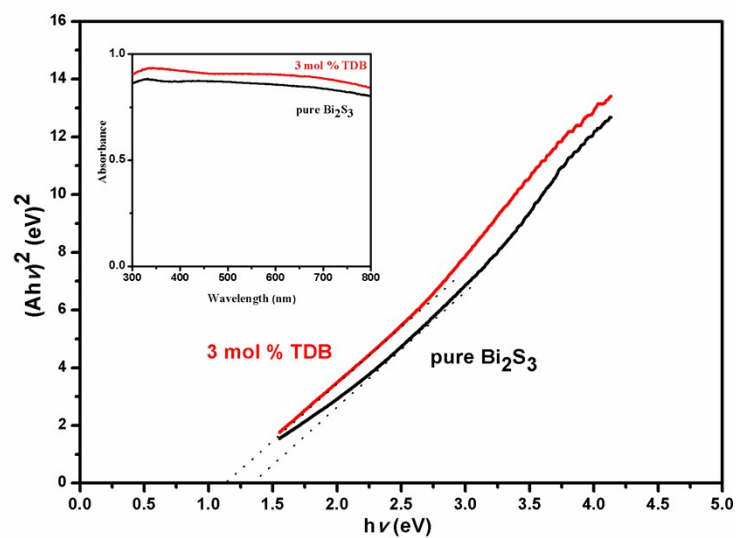

Fig. S3  $h\nu-(Ah\nu)^2$  plot of pure  $\text{Bi}_2\text{S}_3$  and 3 mol % TDB and their UV-visible absorption spectra (the inset).

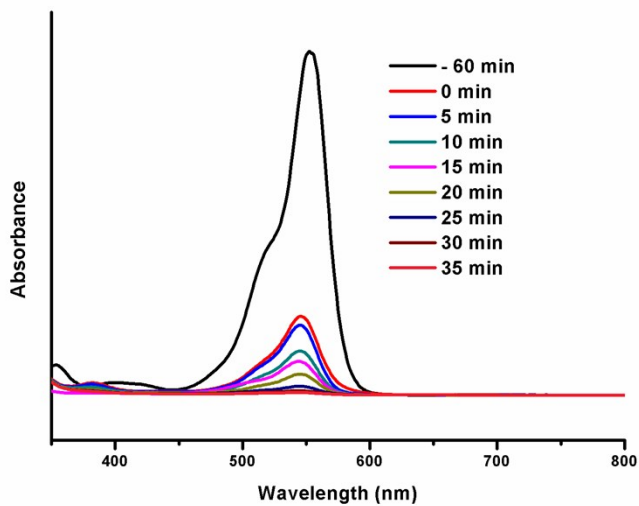

Fig. S4 The curves of degrade RhB (20 mg/L) over pure  $\text{SnS}_2$  under visible light ( $\lambda > 420$  nm) irradiation.

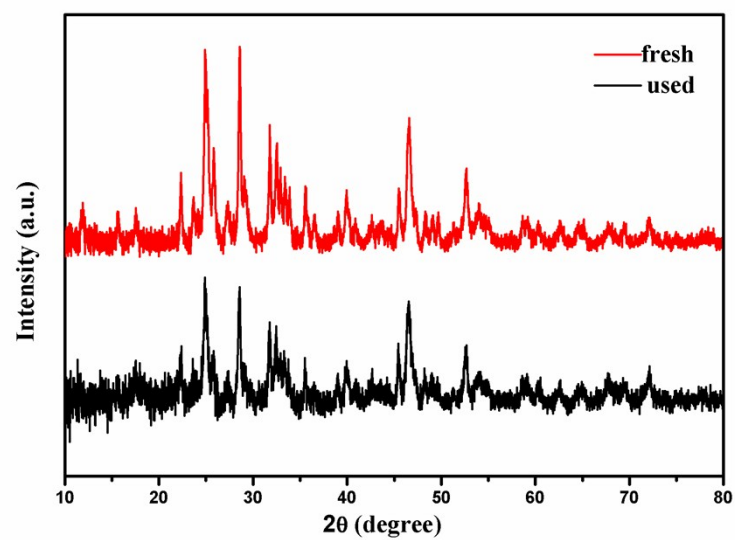

Fig. S5 XRD pattern of fresh and used photocatalysts.
